# Supplementary material for: Analysis of mental and physical disorders associated with COVID-19 in online health forums: a natural language processing study
Source: PubMed Central journal article supplement (PMC8573296; doi:10.1136/bmjopen-2021-056601), 2021-11-05

*Investigating mental and physical disorders associated with COVID-19 in online health forums:  
Supplementary Material*

## Investigating mental and physical disorders associated with COVID-19 in online health forums

### Supplementary Material

#### Methods - Search Terms and Keywords

##### Supplementary Table 1. Key to regular expressions

|    |                                                |
|----|------------------------------------------------|
| [] | One of the characters inside the bracket       |
| +  | One or more occurrences of previous character  |
| *  | Zero or more occurrences of previous character |
| ?  | Zero or one occurrence of previous character   |
| \w | Any alphanumeric character                     |
| \s | Any whitespace character                       |

##### Examples:

- 'auto[\_\s]?immune' will match all of "autoimmune", "auto-immune" and "auto immune".
- 'psycho[st]i[sc]' will match both "psychotic" and "psychosis"
- 'infarct\w\*' will match "infarct", "infarcts", "infarction", "infarctions" and "infarcted"

Matching is case-insensitive. When matching post content or thread titles, keywords have to appear as separate whole words; this requirement is lifted when matching thread URLs. To reduce spurious matches, keywords up to three letters long have to appear in URLs surrounded by underscores ( ) or other non-alphanumeric characters in order to be counted as a match.

##### Supplementary Table 2. Terms used to determine whether a thread or a post was about Covid; these were applied to both thread titles/URLs and post content

|                              |                                                                                                                                                                                         |
|------------------------------|-----------------------------------------------------------------------------------------------------------------------------------------------------------------------------------------|
| <b>Covid terms</b>           | 'covid', 'covid-?19', 'coronavirus', 'corona', 'sars-?cov-?2', 'sars-?2'<br>'shielding', 'pandemi\w*', 'vulnerable', 'quarantined?', 'lockdown', 'distancing', 'isolation', 'isolating' |
| <b>Discarded Covid terms</b> | 'challenging[_\s]times?', 'difficult[_\s]times?', 'hard[_\s]times?'                                                                                                                     |

*Investigating mental and physical disorders associated with COVID-19 in online health forums:  
Supplementary Material*

**Supplementary Table 3. Terms used to search post content only**

|                                |                                                                                                                                               |
|--------------------------------|-----------------------------------------------------------------------------------------------------------------------------------------------|
| <b>Mental health symptoms</b>  | 'worried', 'worry', 'worrying', 'worries', 'anxious', 'anxiety', 'feel[_\s]low', 'feeling[_\s]low', 'depression', 'depressed', 'low[_\s]mood' |
| <b>Intensive care terms</b>    | 'itu', 'icu', 'intensive[_\s]care', 'intubation', 'intubated', 'ventilated', 'ventilator', 'c-?pap', 'ecmo', 'membrane[_\s]oxygenation'       |
| <b>Physical Covid symptoms</b> | 'chest[_\s]pain', 'smell', 'taste', 'dry[_\s]cough', 'anosmia', 'breathe?', 'breathing'                                                       |

**Supplementary Table 4. Term incidence of keywords used to scan thread titles/URLs for the observation period (January 1<sup>st</sup> – May 31<sup>st</sup> 2020) vs a control period (September 1<sup>st</sup> – December 31<sup>st</sup> 2019)**

| Keyword                       | Term incidence                                                       |                                                                       | Included/Excluded? |
|-------------------------------|----------------------------------------------------------------------|-----------------------------------------------------------------------|--------------------|
|                               | Observation period (Jan 1 <sup>st</sup> – May 31 <sup>st</sup> 2020) | Control period (Sep 1 <sup>st</sup> – December 31 <sup>st</sup> 2019) |                    |
| <b>covid</b>                  | 1395                                                                 | 0                                                                     | Included           |
| <b>covid-?19</b>              | 1205                                                                 | 0                                                                     | Included           |
| <b>coronavirus</b>            | 859                                                                  | 0                                                                     | Included           |
| <b>corona</b>                 | 1140                                                                 | 14                                                                    | Included           |
| <b>sars-?cov-?2</b>           | 7                                                                    | 0                                                                     | Included           |
| <b>sars-?2</b>                | 0                                                                    | 0                                                                     | Included           |
| <b>shielding</b>              | 202                                                                  | 0                                                                     | Included           |
| <b>pandemi\w*</b>             | 79                                                                   | 0                                                                     | Included           |
| <b>vulnerable</b>             | 120                                                                  | 3                                                                     | Included           |
| <b>quarantined?</b>           | 54                                                                   | 0                                                                     | Included           |
| <b>lockdown</b>               | 207                                                                  | 1                                                                     | Included           |
| <b>distancing</b>             | 82                                                                   | 0                                                                     | Included           |
| <b>isolation</b>              | 248                                                                  | 2                                                                     | Included           |
| <b>isolating</b>              | 82                                                                   | 0                                                                     | Included           |
| <b>challenging[_\s]times?</b> | 7                                                                    | 0                                                                     | Excluded           |
| <b>difficult[_\s]times?</b>   | 13                                                                   | 5                                                                     | Excluded           |
| <b>hard[_\s]times?</b>        | 22                                                                   | 10                                                                    | Excluded           |

*Investigating mental and physical disorders associated with COVID-19 in online health forums:  
Supplementary Material*

**Supplementary Table 5. Keywords applied to thread titles/URLs together with Covid terms to determine threads concerning Covid comorbidities**

| Comorbid condition        | Search terms                                                                                                                                                                                                                                                                                                               |
|---------------------------|----------------------------------------------------------------------------------------------------------------------------------------------------------------------------------------------------------------------------------------------------------------------------------------------------------------------------|
| Heart/Stroke              | 'heart', 'infarct\w*', 'bypass', 'stent', 'coronary', 'ablation', 'a-?fib', 'af', 'arrhythmia', 'aortic', 'cardio', 'blockers', 'cardiom[yi]opathy', 'statins?', 'pressure', 'valve', 'pacemaker', 'stroke', 'ischa?emia', 'ischa?emic', 'anticoag', 'anticoagulants?', 'xarelto', 'apaxiban', 'rivaroxiban', 'dabigatran' |
| Cancer                    | 'cancer', 'chemo', 'chemotherapy', 'tumou?rs?', 'melanoma', 'leuka?emia', 'radiation', 'radiotherapy'                                                                                                                                                                                                                      |
| Respiratory diseases      | 'asthma', 'asthmatic', 'copd'                                                                                                                                                                                                                                                                                              |
| Mental (health) disorders | 'anxiety', 'anxious', 'depression', 'depressive', 'psycho[st]i[sc]', 'bipolar', 'schizophrenia', 'schizoaffective', 'ocd', 'ptsd'                                                                                                                                                                                          |
| Autoimmune diseases       | 'crohns', 'psoriasis', 'immunosuppress\w+', 'lupus', 'multiple[_s]clerosis', 'ms', 'auto[_s-]?immune'                                                                                                                                                                                                                      |
| Diabetes                  | 'diabet\w+', 'mellitus', 'insulin', 'humira', 'remicade', 'metformin'                                                                                                                                                                                                                                                      |

*Investigating mental and physical disorders associated with COVID-19 in online health forums:  
Supplementary Material*

*Investigating mental and physical disorders associated with COVID-19 in online health forums:  
Supplementary Material*

## Methods - Coding Approach

### Figure 1

# counting users who post in threads about COVID-19 and also express a specific concern, i.e. mention keywords from a list of search terms (e.g. mental\_symptom\_terms) for each given week in time period

```
DEFINE count_user_concerns_week
```

```
FOR each user
```

```
  FOR each week in date_range
```

```
    IF user posted in a COVID-19 thread during week
```

```
      DEFINE sliding_window ← (previous, current and next calendar week)
```

```
        FOR each post by user
```

```
          IF date of post in sliding_window and post content matches regex(keywords)
```

```
            INCREMENT count_user_concerns_week
```

```
            BREAK # exit innermost loop
```

```
          ENDIF
```

```
        ENDFOR
```

```
      ENDIF
```

```
    ENDFOR
```

```
  ENDFOR
```

*Investigating mental and physical disorders associated with COVID-19 in online health forums:  
Supplementary Material*

**Tables 1 and 2**

```
DEFINE
websites # list of online health forums
covid_terms # list of COVID-19 terms
pandemic_terms # list of pandemic terms
symptom_terms # list of physical COVID-19 symptoms
intensive_care_terms # list of intensive care terms
mental_symptom_terms # list of mental health symptoms
mental_drug_terms # list of drugs for mental illnesses
comorbidity_terms # list of comorbid conditions
date_range ← January 1st – May 31st 2020 # time period
```

```
FUNCTION regex
  INPUT list of keywords from a list of search terms
  OUTPUT compiled regex for text containing any of the keywords in the list
ENDFUNCTION
```

**Table 3, Supplementary Figure 1**

```
# counting posts for each given week in time period
DEFINE count_post_week
FOR each website in websites
  FOR each post on website
    FOR week in date_range
      IF date of post is in week
        INCREMENT count_post_week
      ENDIF
    ENDFOR
  ENDFOR
ENDFOR

# computing total number of posts
COMPUTE count_post_all as sum of count_post_week over date_range
```

*Investigating mental and physical disorders associated with COVID-19 in online health forums:  
Supplementary Material*

**Supplementary Figure 2**

# counting posts mentioning keywords from a list of search terms (e.g. covid\_terms) for each given week in time period

DEFINE count\_relevant\_post\_week

FOR each website in websites

    FOR each post on website

        FOR week in date\_range

            IF date of post is in week AND post content matches regex(keywords)

                INCREMENT count\_relevant\_post\_week

            ENDIF

        ENDFOR

    ENDFOR

ENDFOR

# Note: To assess the specificity of search terms, we looked for matches before 1<sup>st</sup> January 2020, i.e. similar to the above with date\_range ← < 1<sup>st</sup> January 2020

# computing relative frequency of posts mentioning keywords from a list of search terms (e.g. covid\_terms) for each given week in time period

COMPUTE ratio of count\_relevant\_post\_week to count\_post\_week

*Investigating mental and physical disorders associated with COVID-19 in online health forums:  
Supplementary Material*

**Supplementary Figure 3**

```
# counting active threads about COVID-19 for each given week in time period
DEFINE count_covid_thread
FOR each website in websites
  FOR each thread on website
    IF thread title or URL matches regex(keywords from covid_terms)
      # date of first and last posts, respectively
      DEFINE active_period ← (thread.start_date, thread.end_date)
      FOR week in date_range
        IF week is in active_period # thread is active
          INCREMENT count_covid_thread
        ENDIF
      ENDFOR
    ENDIF
  ENDFOR
ENDFOR
```

**Supplementary Figure 4**

```
# counting users who post for the first time for each given week in time period
DEFINE count_first_time_user
FOR each user
  FOR week in date_range
    IF date of user's first post is in week
      INCREMENT count_first_time_user
    ENDIF
  ENDFOR
ENDFOR

# counting users whose first post is about COVID-19 for each given week in time period
DEFINE count_covid_first_time_user
FOR each user
  FOR week in date_range
    IF date of user's first post is in week AND post content matches
      regex(keywords from covid_terms)
      INCREMENT count_covid_first_time_user
    ENDIF
  ENDFOR
ENDFOR

# computing percentage of users whose first post is about COVID-19 for each given week in
time period
COMPUTE percentage of count_covid_first_time_user in count_first_time_user
```



*Investigating mental and physical disorders associated with COVID-19 in online health forums:  
Supplementary Material*

**Table 4**

```
# counting threads about a comorbid condition within threads about COVID-19
DEFINE count_comorbid_condition_thread
FOR each COVID-19 thread # see code for Supplementary Figure 3
  IF thread title or URL matches regex(keyword (i.e. condition) from
comorbidity_terms)
    INCREMENT count_comorbid_condition_thread
  ENDIF
ENDFOR

# computing ratio of threads about a comorbid condition to threads about COVID-19
COMPUTE ratio_of_count_comorbid_condition_thread to sum of count_covid_thread over
date_range

# computing number of posts in threads about a comorbid condition
COMPUTE count_comorbid_condition_post as sum of number of posts in threads about a
comorbid condition

# computing ratio of posts in threads about a comorbid condition to posts in threads about
COVID-19
COMPUTE ratio_of_count_comorbid_condition_post to sum of number of posts in threads
about COVID-19
```

*Investigating mental and physical disorders associated with COVID-19 in online health forums: Supplementary Material*

**Supplementary Figure 1: Weekly number of posts on any topic in the period January 2020 to May 2020**

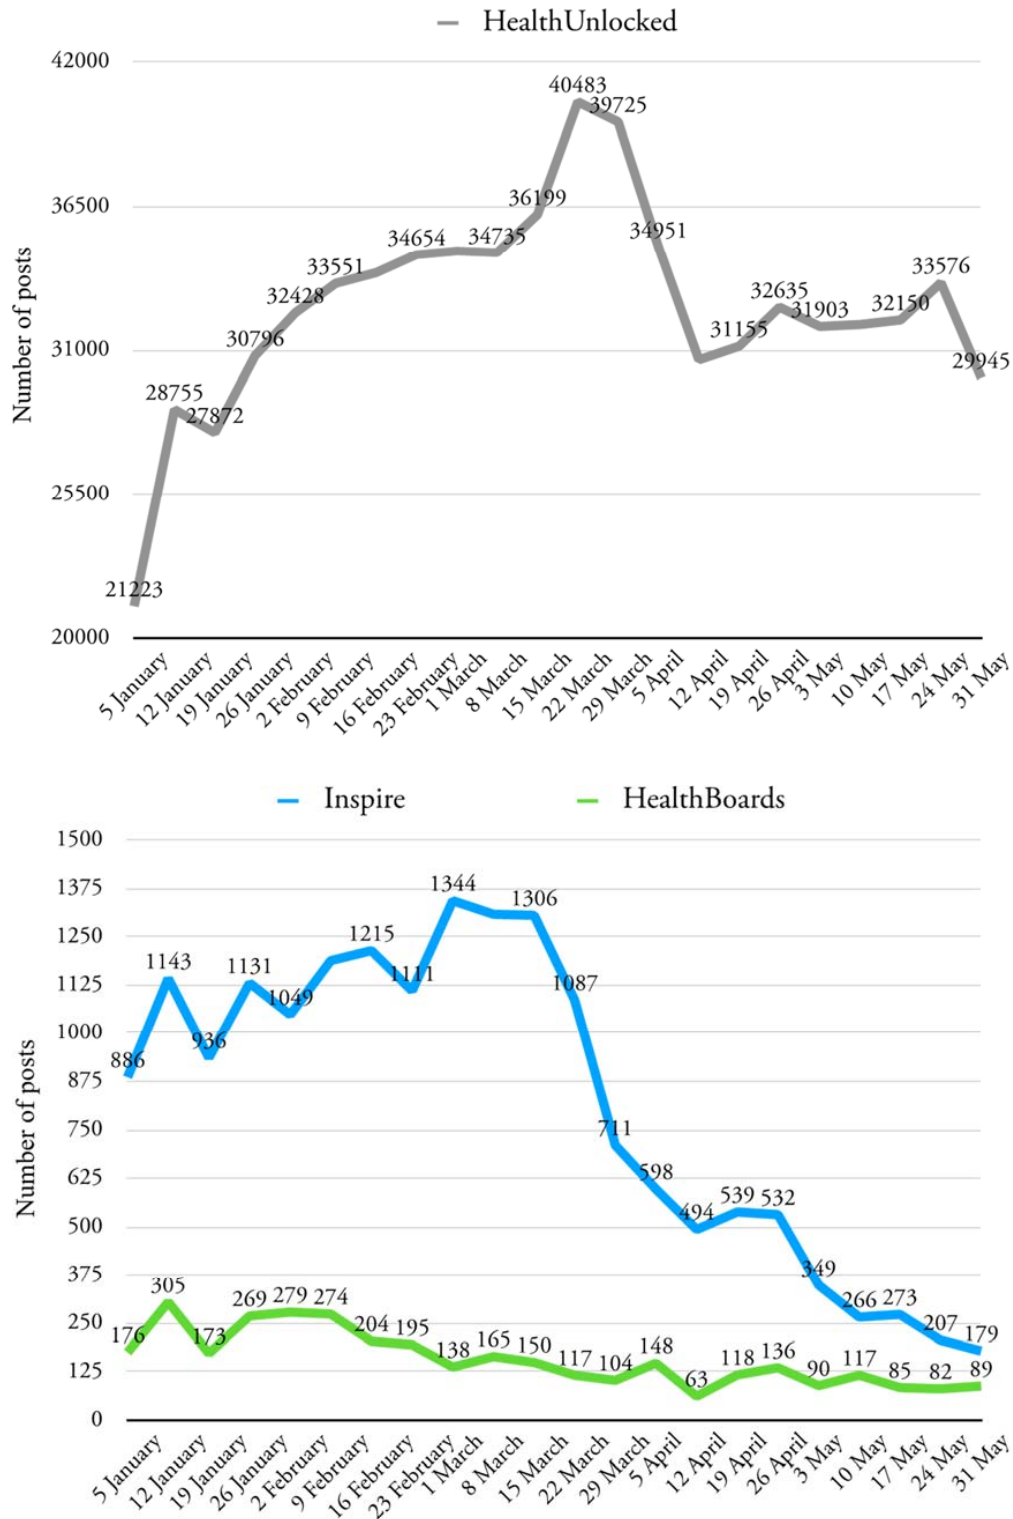

*Investigating mental and physical disorders associated with COVID-19 in online health forums:  
Supplementary Material*

**Supplementary Figure 2: Percentage of COVID-19 related posts relative to all weekly posts**

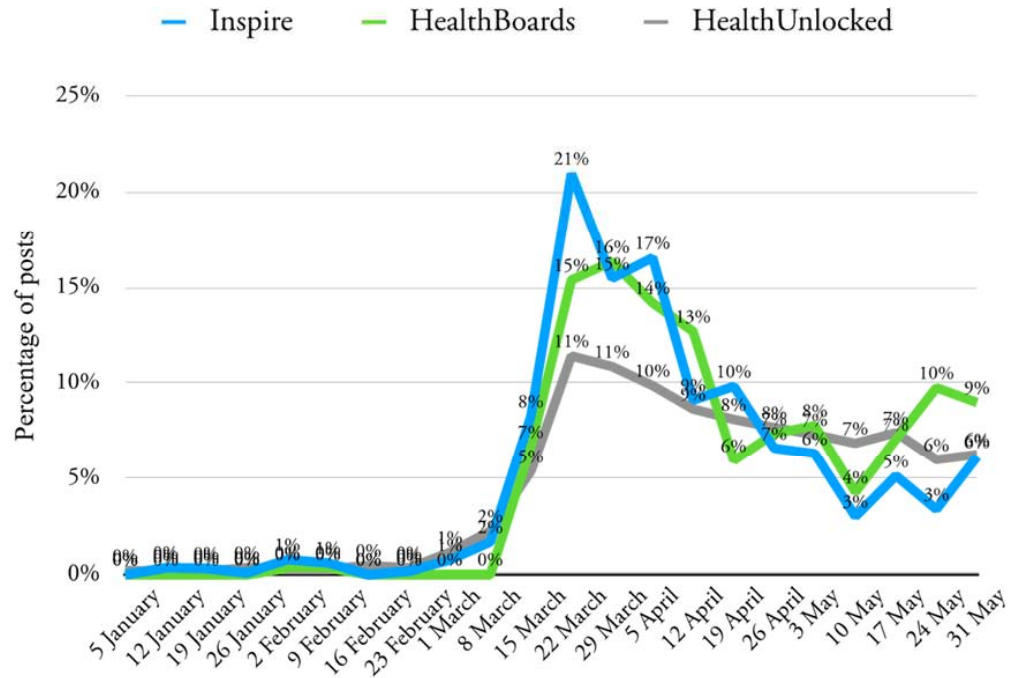

*Investigating mental and physical disorders associated with COVID-19 in online health forums:  
Supplementary Material*

**Supplementary Figure 3: Maximum number of COVID-19 related threads active in each given week**

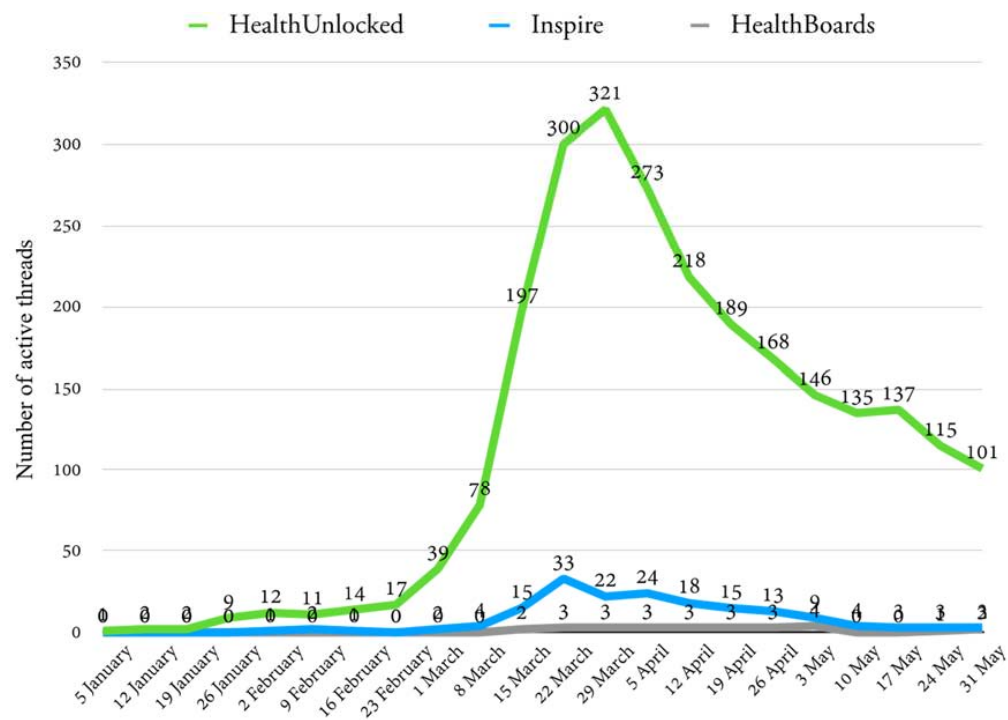

A thread is considered closed and therefore no longer active when there are no further posts from that week within the data collection period (up until 31<sup>st</sup> May 2020). Note that this does not rule out the possibility of a thread becoming reactivated past this date.

*Investigating mental and physical disorders associated with COVID-19 in online health forums:  
Supplementary Material*

**Supplementary Figure 4: Proportion of users whose very first post was in a COVID-19 related thread, given weekly**

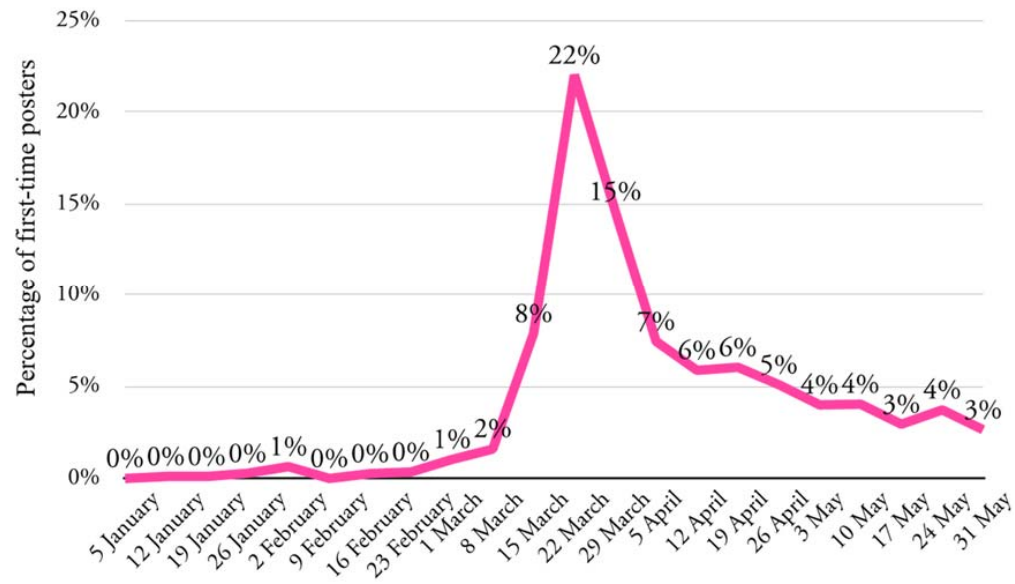

Supplement: bmjopen-2021-056601supp001.pdf [file bmjopen-2021-056601supp001.pdf]
